# Supplementary material for: Association of Neighborhood Deprivation With Epigenetic Aging Using 4 Clock Metrics
Source: PubMed Central journal article supplement (PMC7643028; doi:10.1001/jamanetworkopen.2020.24329), 2020-11-04
Supplement: jamanetwopen-e2024329-s001.pdf [file jamanetwopen-e2024329-s001.pdf]

## Supplementary Online Content

Lawrence KG, Kresovich JK, O'Brien KM, et al. Association of neighborhood deprivation with epigenetic aging using 4 clock metrics. *JAMA Netw Open*. 2020;3(11):e2024329. doi:10.1001/jamanetworkopen.2020.24329

**eTable 1.** Correlations Between Epigenetic Age Acceleration Metrics

**eTable 2.** Associations Between Neighborhood Deprivation and Epigenetic Age Acceleration (N=2,630), Accounting for Cell-Type Proportions

This supplementary material has been provided by the authors to give readers additional information about their work.

| <b>eTable 1. Correlations between epigenetic age acceleration metrics</b> |         |        |          |         |
|---------------------------------------------------------------------------|---------|--------|----------|---------|
|                                                                           | Horvath | Hannum | Phenoage | GrimAge |
| Horvath                                                                   | 1.00    |        |          |         |
| Hannum                                                                    | 0.57    | 1.00   |          |         |
| Phenoage                                                                  | 0.49    | 0.48   | 1.00     |         |
| GrimAge                                                                   | 0.13    | 0.25   | 0.44     | 1.00    |

| <b>eTable 2. Associations between neighborhood deprivation and epigenetic age acceleration (N=2,630), accounting for cell-type proportions<sup>a</sup></b> |            |                    |         |                   |         |                    |         |                   |         |
|------------------------------------------------------------------------------------------------------------------------------------------------------------|------------|--------------------|---------|-------------------|---------|--------------------|---------|-------------------|---------|
|                                                                                                                                                            |            | Horvath (z-score)  |         | Hannum (z-score)  |         | PhenoAge (z-score) |         | GrimAge (z-score) |         |
| <b>Model 1</b>                                                                                                                                             |            |                    |         |                   |         |                    |         |                   |         |
|                                                                                                                                                            | N(%)       | β(95%CI)           | p-value | β(95%CI)          | p-value | β(95%CI)           | p-value | β(95%CI)          | p-value |
| Level 1: ≤25                                                                                                                                               | 1256(47.8) | Ref                | Ref     | Ref               | Ref     | Ref                | Ref     | Ref               | Ref     |
| Level 2: 26-50                                                                                                                                             | 785(29.8)  | 0.10(-0.02,0.22)   | 0.10    | 0.17(0.05,0.29)   | 0.006   | 0.24(0.13,0.36)    | <.0001  | 0.28(0.16,0.40)   | <.0001  |
| Level 3: 51-75                                                                                                                                             | 430(16.4)  | 0.10(-0.07,0.27)   | 0.24    | 0.09(-0.06,0.24)  | 0.22    | 0.26(0.12,0.40)    | 0.0002  | 0.31(0.16,0.46)   | <.0001  |
| Level 4: 76-100                                                                                                                                            | 159(6.0)   | -0.01(-0.23,0.22)  | 0.94    | 0.14(-0.07,0.34)  | 0.20    | 0.23(0.02,0.44)    | 0.03    | 0.38(0.12,0.63)   | 0.004   |
| <b>Model 2</b>                                                                                                                                             |            |                    |         |                   |         |                    |         |                   |         |
|                                                                                                                                                            | N(%)       | β(95%CI)           | p-value | β(95%CI)          | p-value | β(95%CI)           | p-value | β(95%CI)          | p-value |
| Level 1: ≤25                                                                                                                                               | 1256(47.8) | Ref                | Ref     | Ref               | Ref     | Ref                | Ref     | Ref               | Ref     |
| Level 2: 26-50                                                                                                                                             | 785(29.8)  | 0.09(-0.04, 0.23)  | 0.18    | 0.12(-0.01,0.25)  | 0.07    | 0.20(0.08,0.32)    | 0.001   | 0.15(0.05,0.25)   | 0.004   |
| Level 3: 51-75                                                                                                                                             | 430(16.4)  | 0.10(-0.08, 0.29)  | 0.27    | 0.04(-0.12,0.21)  | 0.60    | 0.22(0.07,0.37)    | 0.005   | 0.18(0.06,0.31)   | 0.005   |
| Level 4: 76-100                                                                                                                                            | 159(6.0)   | -0.03(-0.28, 0.22) | 0.82    | 0.03(-0.19, 0.26) | 0.78    | 0.13(-0.09,0.36)   | 0.25    | 0.12(-0.08,0.33)  | 0.23    |
| <sup>a</sup> Weighted for case-cohort sampling scheme                                                                                                      |            |                    |         |                   |         |                    |         |                   |         |
| Model 1: Houseman cell type proportions (CD4+ T-cells, CD8+ T-cells, monocytes, natural killer cells, and granulocytes)                                    |            |                    |         |                   |         |                    |         |                   |         |
| Model 2: Model 1+ smoking status, environmental tobacco smoke, alcohol, BMI, income, education                                                             |            |                    |         |                   |         |                    |         |                   |         |
